# Supplementary material
Source: HighWire-hosted journal article supplement (https://rmdopen.bmj.com/content/7/3/e001824)
Supplement: inline-supplementary-material-1 [file inline-supplementary-material-1.xlsx]

## Sheet: Feuil1
	Targeted Resequencing Panel	Fever panel (Bozgeyik et al)	NLR / Inflammasome components
AIM2			X
ASC			X
CARD14	X	X
CASP1	X		X
CASP11			X
CASP8			X
CECR1	X	X
CIITA			X
ELANE		X
GSDMD			X
IL10	X
IL10RA	X	X
IL10RB	X	X
IL1RN	X	X
IL36RN	X
LPIN2	X	X
MDFIC	X
MEFV	X	X
MVK	X	X
NAIP			X
NCSTN	X
NLRC3			X
NLRC4	X		X
NLRC5			X
NLRP1	X		X
NLRP10			X
NLRP11			X
NLRP12	X	X	X
NLRP13			X
NLRP14			X
NLRP2			X
NLRP3	X	X	X
NLRP4			X
NLRP5			X
NLRP6			X
NLRP7		X	X
NLRP8			X
NLRP9			X
NLRX1			X
NOD1 (NLRC1)			X
NOD2 (NLRC2)	X	X
PLCG2	X
POMP	X
PSENEN	X
PSMA3	X
PSMB4	X
PSMB8	X	X
PSMB9	X
PSTPIP1	X	X
RBCK1	X
SH3BP2	X
SLC29A3	X
TNFRSF11A	X	X
TNFRSF1A	X	X
TNFRSF9	X
